# Supplementary material for: Association of Bone Metastasis With Early-Stage Breast Cancer in Women With and Without Precancer Osteoporosis According to Osteoporosis Therapy Status
Source: PubMed Central journal article supplement (PMC6484629; doi:10.1001/jamanetworkopen.2019.0429), 2019-03-08
Supplement: jamanetwopen-2-e190429-s001.pdf [file jamanetwopen-2-e190429-s001.pdf]

## Supplementary Online Content

Chen H-M, Chen F-P, Yang K-C, Yuan S-S. Association of bone metastasis with early-stage breast cancer in women with and without precancer osteoporosis according to osteoporosis therapy status. *JAMA Netw Open*. 2019;2(3):e190429. doi: 10.1001/jamanetworkopen.2019.0429

**eMethods 1.** Sampling Procedure of the National Health Insurance Research Database and Selection of a Diagnosis Window for the Data Sets

**eMethods 2.** Definitions of Breast Cancer, Osteoporosis, Cancer Staging, Osteoporosis Medication, and Mortality

**eMethods 3.** Definition of Osteoporosis Therapy

**eFigure 1.** Age Distributions of the Studied Cohorts

**eFigure 2.** Model Diagnostics for Cox Proportional Hazards Models Based on Schoenfeld Residuals

**eFigure 3.** Plots for Comparisons of Time to Bone Metastases for Patients with Breast Cancer With Different Osteoporosis Statuses

**eFigure 4.** Percentages of Patients With Metastases or who Died by Age

**eTable.** Proportions of Patients Whose First Distant Metastatic Site was Bone, Lung, or Liver

### **eReferences**

This supplementary material has been provided by the authors to give readers additional information about their work.

## **eMethods 1. Sampling Procedure of the National Health Insurance Research Database and Selection of a Diagnosis Window for the Data Sets**

The National Health Insurance Research Database (NHIRD) service assigned each individual in the database a consecutive number, and then used Oracle's DBMS\_RANDOM package (Oracle Corporation) to generate 1 million random numbers in order to draw 1 million random samples from the population. There were 22 717 053 beneficiaries in the database enrolled in the National Health Insurance (NHI) program in the year 2005. The 1 million samples drawn from this population are called the Longitudinal Health Insurance 2005 (LHID2005) cohort.

Although the International Classification of Diseases, Ninth Revision (ICD-9) system was used in large hospitals in Taiwan long before the year 1991 and was officially adopted by Taiwan's medical system in March 1991, the A-Code system was phased out in the year 2002, and some hospitals might still have been using the A-Code system before 2002. In the A-Code system, all metastases (ICD-9 codes: 196–198) were coded as A139; therefore, we selected the 2002-2011 diagnosis window to distinguish the locations of metastases and to have at least 2 years of follow-up time.

## **eMethods 2. Definitions of Breast Cancer, Osteoporosis, Cancer Staging, Osteoporosis Medication, and Mortality**

### **Breast Cancer**

ICD-9 codes: 174, 2330, 2383, and 2393.

### **Osteoporosis**

ICD-9 codes: 7330, 805, 806, 808, 812, 813, 73312, 73313, and 73314; excluding fracture events caused by accidents: E81, E82, E83, E84, and E88.

### **Cancer Staging**

The ICD-9 code 174 does not specify the staging of breast cancer; therefore, we included information of “secondary and unspecified malignant neoplasm” (ICD-9 codes: 196, 197, and 198) and selected those with no secondary and unspecified malignant neoplasm at cancer diagnosis as patients with early stage breast cancer.

### **Osteoporosis Medication**

As for osteoporosis medicine, we included 5 bisphosphonates: alendronate, etidronate, ibandronic, pamidronate, and zoledronic acid; and 5 non-bisphosphonate drugs: calcitonin, denosumab, estrogen, raloxifene, and teriparatide. Risedronate and bazedoxifene were not prescribed in Taiwan from 2002 to 2013.

### **Mortality**

As enrollment in the NHI program is compulsory for Taiwanese citizens, withdrawal from the program is often due to death of the enrollee.<sup>1,2</sup> However, we followed a more cautious procedure and included 5 additional criteria to define mortality. First, we included mortality information from the Catastrophic Illness Program, if the patient was enrolled in this program. Second, discharge reasons for hospitalized patients were death, suicide, or critical illness. Third, the patient was voluntarily discharged from the hospital against medical advice and then was removed from the NHI program in 28 days. Fourth, the patient was critically ill in the emergency department and received cardiopulmonary resuscitation, electrical defibrillation or cardioversion, endotracheal tube insertion, or epinephrine or norepinephrine injection and then was removed from the NHI program in 28 days. Fifth, we further required those patients who met the aforementioned criteria to have no visits and treatments in their medical records after NHI disenrollment.

### **eMethods 3. Definition of Osteoporosis Therapy**

Osteoporosis therapy is defined as a treatment started before the diagnosis of breast cancer with at least 180 days' use of osteoporosis drugs in 1 year; the quantities of drugs were calculated according to the WHO's Defined Daily Dose system. We employed a dynamic programming algorithm to determine the medical adherence to osteoporosis therapy.

The "no therapy" group comprises those who had established osteoporosis before the diagnosis of breast cancer but were never prescribed any medicine before breast cancer diagnosis.

**eFigure 1. Age Distributions of the Studied Cohorts**

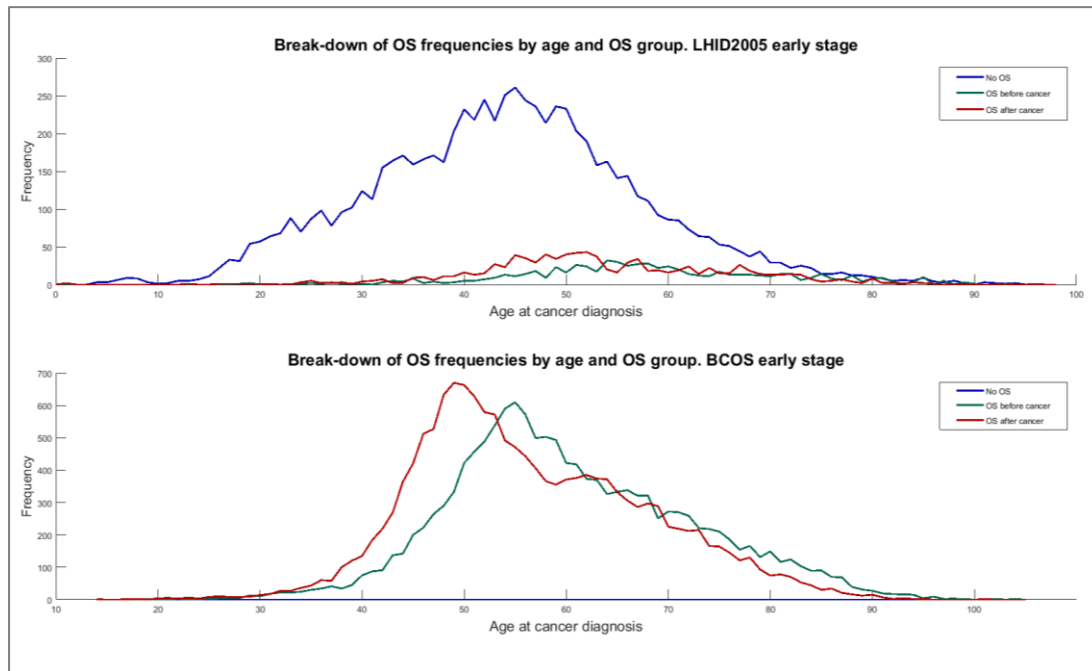

OS = osteoporosis.

## eFigure 2. Model Diagnostics for Cox Proportional Hazards Models Based on Schoenfeld Residuals

(A) Age-adjusted Cox models for the risk of developing bone metastasis (LHID2005). (B) Age-adjusted Cox models, bisphosphonate users versus those never treated with any drug. (C) Age-adjusted Cox models, non-bisphosphonate users versus those never treated with any drug.

eFigure 2(A)

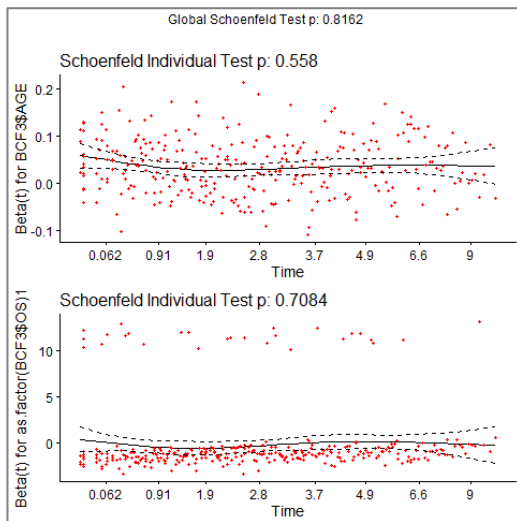

eFigure 2(B)

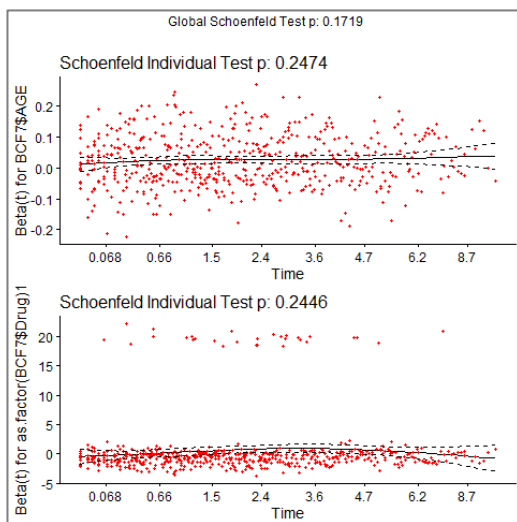

eFigure 2(C)

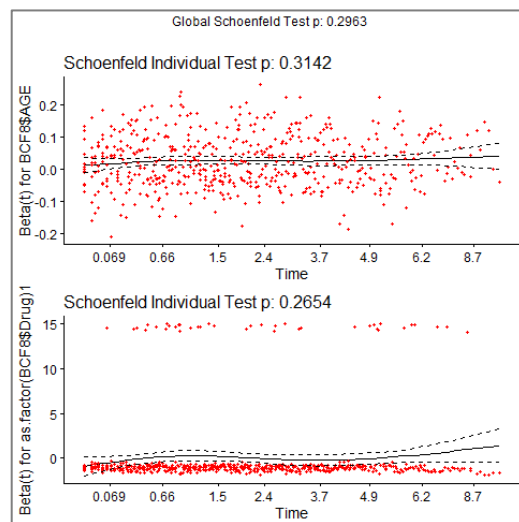

**eFigure 3. Plots for Comparisons of Time to Bone Metastases for Patients With Breast Cancer With Different Osteoporosis Statuses**

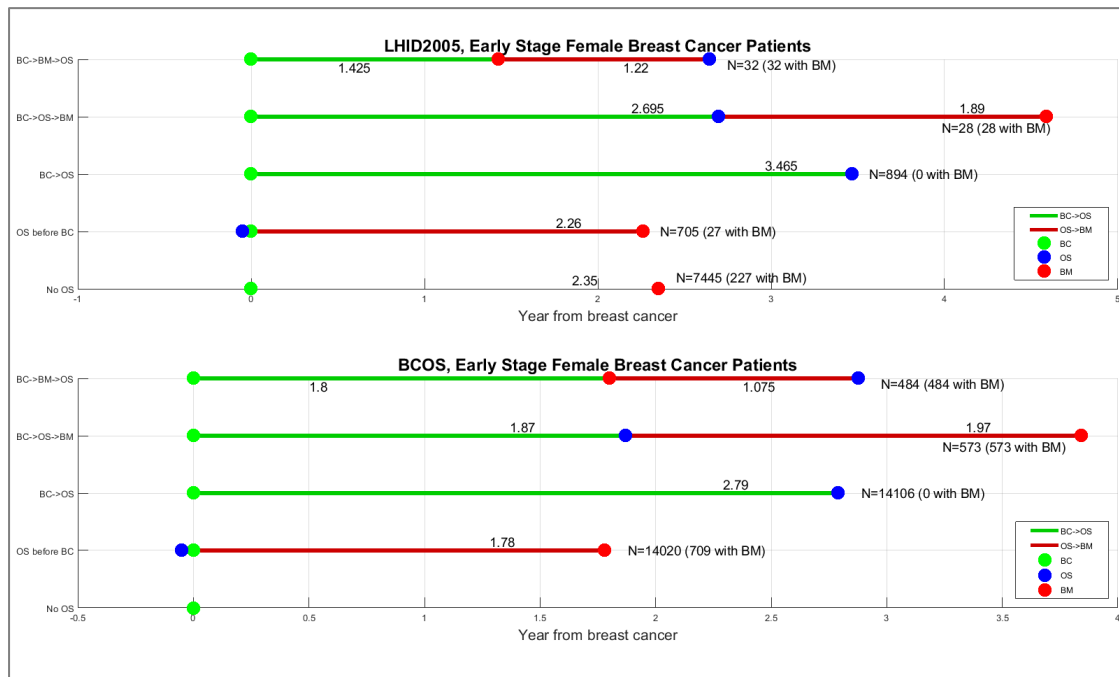

BC = breast cancer, OS = osteoporosis, BM = bone metastasis, N = sample size.

**eFigure 4. Percentages of Patients With Metastases or who Died by Age**

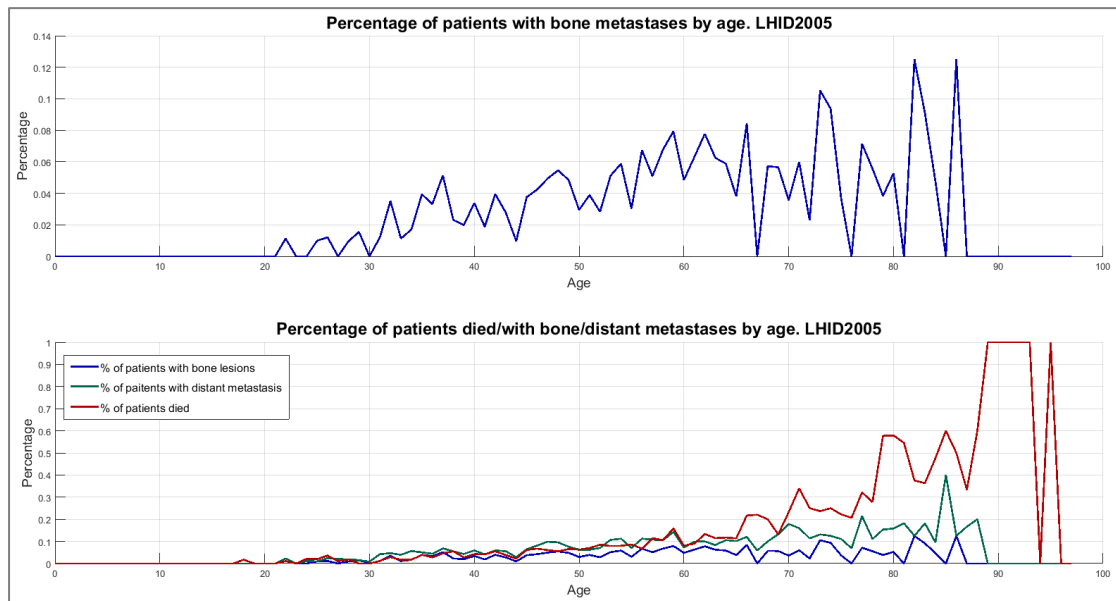

Age = age at breast cancer diagnosis.



**eTable. Proportions of Patients Whose First Distant Metastatic Site was Bone, Lung, or Liver**

| <b>Cohort</b>   | <b>Stratum</b>   | <b>Bone/Marrow</b> | <b>Lung</b> | <b>Liver</b> | <b>Total<sup>a</sup></b> |
|-----------------|------------------|--------------------|-------------|--------------|--------------------------|
| <b>LHID2005</b> | <b>Exposed</b>   | 23 (37.7%)         | 15 (24.6%)  | 8 (13.1%)    | 61                       |
|                 | <b>Unexposed</b> | 220 (40.6%)        | 143 (26.4%) | 115 (21.2%)  | 542                      |
|                 | <b>All</b>       | 243 (40.3%)        | 158 (26.2%) | 123 (20.4%)  | 603                      |

Results are expressed as N, or n. (%). Bone and bone marrow were most likely to be the first sites of distant metastasis for both exposed and unexposed groups.

<sup>a</sup> Total number of patients with any type of metastasis.

**eReferences.**

1. Wu C-Y, Chen Y-J, Ho H-J, Hsu Y-C, Kuo K-N, Wu M-S, Lin J-T. Association between nucleoside analogues and risk of hepatitis B virus-related hepatocellular carcinoma recurrence following liver resection. *JAMA*. 2012; 308(18): 1906-1913.
2. Cheng C-L, Chien H-C, Lee C-H, Lin W-J, Yang Y-H. Validity of in-hospital mortality data among patients with acute myocardial infarction or stroke in National Health Insurance Research Database in Taiwan. *International Journal of Cardiology*. 2015; 201: 96-101.
